# Supplementary material
Source: PubMed Central journal article supplement (PMC8451428)
Supplement: NIHMS1736485-supplement-1.pdf [file NIHMS1736485-supplement-1.pdf]

**Supplementary Table 1. Meta-analysis of association between total fiber intake and all taxa in the NCI and NYU study populations**

| Phylum; Class; Order; Family; Genus; Species            | NYU       |       |         |       | NCI       |        |         |       | Meta FC | Meta CI     | Meta p |
|---------------------------------------------------------|-----------|-------|---------|-------|-----------|--------|---------|-------|---------|-------------|--------|
|                                                         | Base Mean | FC    | p-value | p-adj | Base Mean | Log2FC | p-value | p-adj |         |             |        |
| <b>PHYLUM LEVEL</b>                                     |           |       |         |       |           |        |         |       |         |             |        |
| Actinobacteria                                          | 143.20    | 0.990 | 0.670   | 0.893 | 115.59    | 0.982  | 0.292   | 0.621 | 0.985   | 0.959-1.012 | 0.294  |
| Bacteroidetes                                           | 330.53    | 0.983 | 0.472   | 0.893 | 3075.49   | 1.015  | 0.074   | 0.258 | 1.012   | 0.996-1.028 | 0.443  |
| Firmicutes                                              | 2126.89   | 1.000 | 1.000   | 1.000 | 5057.10   | 1.006  | 0.478   | 0.621 | 1.000   | 0.996-1.005 | 0.614  |
| Proteobacteria                                          | 46.68     | 1.057 | 0.026   | 0.102 | 198.49    | 0.992  | 0.532   | 0.621 | 1.005   | 0.983-1.027 | 0.261  |
| <b>CLASS LEVEL</b>                                      |           |       |         |       |           |        |         |       |         |             |        |
| Actinobacteria; Actinobacteria                          | 95.25     | 1.001 | 0.963   | 1.000 | 92.05     | 0.982  | 0.450   | 0.531 | 0.991   | 0.959-1.025 | 0.613  |
| Actinobacteria; Coriobacteriia                          | 45.54     | 0.995 | 0.829   | 1.000 | 26.14     | 0.971  | 0.008   | 0.098 | 0.975   | 0.956-0.994 | 0.040  |
| Bacteroidetes; Bacteroidia                              | 327.59    | 0.986 | 0.570   | 1.000 | 3253.15   | 1.011  | 0.273   | 0.507 | 1.007   | 0.989-1.026 | 0.703  |
| Firmicutes; Bacilli                                     | 70.42     | 0.988 | 0.612   | 1.000 | 68.40     | 0.975  | 0.230   | 0.499 | 0.981   | 0.951-1.011 | 0.226  |
| Firmicutes; Clostridia                                  | 2017.61   | 1.000 | 1.000   | 1.000 | 4676.67   | 1.006  | 0.444   | 0.531 | 1.000   | 0.997-1.004 | 0.586  |
| Firmicutes; Erysipelotrichi                             | 45.10     | 0.983 | 0.467   | 1.000 | 104.43    | 1.003  | 0.808   | 0.808 | 0.999   | 0.978-1.020 | 0.735  |
| Proteobacteria; Betaproteobacteria                      | 4.81      | 1.008 | 0.746   | 1.000 | 80.63     | 0.994  | 0.743   | 0.805 | 0.999   | 0.972-1.027 | 0.995  |
| Proteobacteria; Deltaproteobacteria                     | 2.09      | 1.028 | 0.206   | 1.000 | 20.90     | 0.981  | 0.322   | 0.522 | 1.001   | 0.974-1.030 | 0.856  |
| Proteobacteria; Gammaproteobacteria                     | 39.69     | 1.026 | NA      | NA    | 76.42     | 1.021  | 0.449   | 0.531 | 1.024   | 0.990-1.059 | NA     |
| <b>ORDER LEVEL</b>                                      |           |       |         |       |           |        |         |       |         |             |        |
| Actinobacteria; Actinobacteria; Actinomycetales         | 3.69      | 0.963 | 0.134   | 1.000 | 1.14      | 0.962  | 0.163   | 0.349 | 0.962   | 0.928-0.998 | 0.041  |
| Actinobacteria; Actinobacteria; Bifidobacteriales       | 91.55     | 0.999 | 0.950   | 1.000 | 90.91     | 0.978  | 0.464   | 0.633 | 0.991   | 0.955-1.028 | 0.572  |
| Actinobacteria; Coriobacteriia; Coriobacteriales        | 45.54     | 0.994 | 0.798   | 1.000 | 26.14     | 0.971  | 0.007   | 0.083 | 0.974   | 0.955-0.994 | 0.036  |
| Bacteroidetes; Bacteroidia; Bacteroidales               | 327.61    | 0.986 | 0.563   | 1.000 | 3253.13   | 1.011  | 0.276   | 0.517 | 1.008   | 0.989-1.027 | 0.712  |
| Firmicutes; Bacilli; Lactobacillales                    | 65.05     | 0.992 | 0.737   | 1.000 | 62.58     | 0.964  | 0.135   | 0.338 | 0.978   | 0.945-1.012 | 0.194  |
| Firmicutes; Bacilli; Turicibacterales                   | 4.68      | 0.985 | 0.467   | 1.000 | 5.61      | 1.020  | 0.601   | 0.751 | 0.993   | 0.958-1.029 | 0.890  |
| Firmicutes; Clostridia; Clostridiales                   | 2017.52   | 1.000 | 1.000   | 1.000 | 4676.48   | 1.006  | 0.442   | 0.633 | 1.000   | 0.998-1.002 | 0.585  |
| Firmicutes; Erysipelotrichi; Erysipelotrichales         | 45.10     | 0.982 | 0.470   | 1.000 | 104.43    | 1.003  | 0.805   | 0.863 | 0.999   | 0.977-1.021 | 0.740  |
| Proteobacteria; Betaproteobacteria; Burkholderiales     | 4.25      | 1.015 | 0.552   | 1.000 | 80.51     | 0.993  | 0.724   | 0.836 | 1.001   | 0.973-1.031 | 0.867  |
| Proteobacteria; Deltaproteobacteria; Desulfovibrionales | 2.09      | 1.030 | 0.205   | 1.000 | 20.90     | 0.981  | 0.326   | 0.544 | 1.001   | 0.972-1.032 | 0.848  |
| Proteobacteria; Gammaproteobacteria; Enterobacteriales  | 34.63     | 1.028 | NA      | NA    | 53.48     | 0.991  | NA      | NA    | 1.018   | 0.979-1.059 | NA     |
| Proteobacteria; Gammaproteobacteria; Pasteurellales     | 4.88      | 0.999 | 0.939   | 1.000 | 4.62      | 1.000  | 0.996   | 0.996 | 0.999   | 0.964-1.035 | 0.954  |



|                                                                                           |        |       |       |       |         |       |       |       |       |             |       |
|-------------------------------------------------------------------------------------------|--------|-------|-------|-------|---------|-------|-------|-------|-------|-------------|-------|
| Actinobacteria; Coriobacteriia; Coriobacteriales;<br>Coriobacteriaceae; Adlercreutzia     | 6.74   | 1.017 | 0.692 | 0.967 | 2.40    | 0.991 | 0.644 | 0.797 | 0.995 | 0.962-1.030 | 0.960 |
| Actinobacteria; Coriobacteriia; Coriobacteriales;<br>Coriobacteriaceae; Collinsella       | 30.17  | 1.036 | 0.442 | 0.913 | 14.94   | 0.985 | 0.415 | 0.797 | 0.992 | 0.959-1.026 | 0.967 |
| Actinobacteria; Coriobacteriia; Coriobacteriales;<br>Coriobacteriaceae; Eggerthella       | 6.18   | 0.985 | NA    | NA    | 2.09    | 0.990 | 0.631 | 0.797 | 0.989 | 0.951-1.028 | NA    |
| Actinobacteria; Actinobacteria; Actinomycetales;<br>Actinomycetaceae; Actinomyces         | 2.16   | 0.885 | 0.003 | 0.110 | 0.75    | 0.969 | 0.130 | 0.454 | 0.951 | 0.917-0.986 | 0.002 |
| Actinobacteria; Actinobacteria; Bifidobacteriales;<br>Bifidobacteriaceae; Bifidobacterium | 84.01  | 1.001 | 0.973 | 0.973 | 90.68   | 1.004 | 0.850 | 0.925 | 1.003 | 0.967-1.041 | 0.874 |
| Bacteroidetes; Bacteroidia; Bacteroidales;<br>[Odoribacteraceae]; Odoribacter             | 0.68   | 0.995 | 0.916 | 0.967 | 10.88   | 0.946 | 0.004 | 0.176 | 0.953 | 0.921-0.987 | 0.032 |
| Bacteroidetes; Bacteroidia; Bacteroidales;<br>Porphyromonadaceae; Parabacteroides         | 13.09  | 0.920 | 0.029 | 0.218 | 131.35  | 1.004 | 0.780 | 0.869 | 0.993 | 0.966-1.020 | 0.181 |
| Bacteroidetes; Bacteroidia; Bacteroidales;<br>Bacteroidaceae; Bacteroides                 | 253.86 | 0.973 | 0.456 | 0.913 | 2927.16 | 1.002 | 0.887 | 0.925 | 0.998 | 0.972-1.025 | 0.673 |
| Bacteroidetes; Bacteroidia; Bacteroidales;<br>Prevotellaceae; Prevotella                  | 20.36  | 0.926 | 0.088 | 0.520 | 482.01  | 1.038 | 0.076 | 0.391 | 1.017 | 0.980-1.056 | 0.949 |
| Firmicutes; Erysipelotrichi; Erysipelotrichales;<br>Erysipelotrichaceae; [Eubacterium]    | 20.65  | 0.950 | 0.255 | 0.875 | 42.55   | 1.026 | 0.217 | 0.590 | 1.012 | 0.976-1.050 | 0.937 |
| Firmicutes; Clostridia; Clostridiales; Clostridiaceae;<br>SMB53                           | 0.62   | 1.035 | 0.443 | 0.913 | 0.88    | 1.045 | 0.029 | 0.391 | 1.044 | 1.007-1.082 | 0.036 |
| Firmicutes; Clostridia; Clostridiales; Lachnospiraceae;<br>Lachnospira                    | 31.63  | 1.042 | 0.279 | 0.875 | 163.91  | 1.026 | 0.091 | 0.406 | 1.028 | 1.000-1.057 | 0.050 |
| Firmicutes; Clostridia; Clostridiales; Ruminococcaceae;<br>Faecalibacterium               | 230.42 | 1.030 | 0.367 | 0.913 | 549.73  | 1.025 | 0.078 | 0.391 | 1.025 | 1.000-1.051 | 0.059 |
| Firmicutes; Clostridia; Clostridiales; Ruminococcaceae;<br>Oscillospira                   | 22.58  | 0.973 | 0.386 | 0.913 | 85.60   | 0.984 | 0.079 | 0.391 | 0.982 | 0.965-1.000 | 0.063 |
| Firmicutes; Clostridia; Clostridiales; Ruminococcaceae;<br>Ruminococcus                   | 62.89  | 1.010 | 0.782 | 0.967 | 340.79  | 0.975 | 0.059 | 0.391 | 0.979 | 0.955-1.004 | 0.250 |
| Firmicutes; Clostridia; Clostridiales; Veillonellaceae;<br>Veillonella                    | 4.41   | 0.927 | 0.096 | 0.520 | 3.57    | 1.001 | 0.944 | 0.959 | 0.987 | 0.950-1.026 | 0.263 |
| Firmicutes; Clostridia; Clostridiales; Clostridiaceae;<br>Clostridium                     | 2.39   | 0.997 | 0.941 | 0.967 | 17.50   | 1.031 | 0.117 | 0.443 | 1.025 | 0.990-1.062 | 0.288 |
| Firmicutes; Clostridia; Clostridiales; Lachnospiraceae;<br>[Ruminococcus]                 | 288.25 | 0.911 | 0.007 | 0.139 | 201.55  | 1.015 | 0.178 | 0.545 | 1.005 | 0.985-1.026 | 0.355 |
| Firmicutes; Clostridia; Clostridiales; Lachnospiraceae;<br>Anaerostipes                   | 5.92   | 1.007 | 0.859 | 0.967 | 10.66   | 1.018 | 0.287 | 0.641 | 1.016 | 0.986-1.048 | 0.377 |
| Firmicutes; Clostridia; Clostridiales; Lachnospiraceae;<br>Dorea                          | 104.47 | 1.022 | 0.418 | 0.913 | 65.24   | 1.004 | 0.666 | 0.797 | 1.006 | 0.988-1.025 | 0.382 |
| Firmicutes; Clostridia; Clostridiales; Veillonellaceae;<br>Phascolarctobacterium          | 18.58  | 1.010 | 0.832 | 0.967 | 34.43   | 1.012 | 0.558 | 0.797 | 1.012 | 0.975-1.049 | 0.571 |
| Firmicutes; Clostridia; Clostridiales; Lachnospiraceae;<br>Blautia                        | 676.47 | 1.040 | 0.178 | 0.753 | 513.86  | 0.979 | 0.046 | 0.391 | 0.986 | 0.967-1.005 | 0.635 |
| Firmicutes; Clostridia; Clostridiales; Veillonellaceae;<br>Dialister                      | 16.99  | 0.984 | 0.713 | 0.967 | 25.15   | 0.994 | 0.780 | 0.869 | 0.992 | 0.955-1.031 | 0.648 |
| Firmicutes; Clostridia; Clostridiales; Lachnospiraceae;<br>Roseburia                      | 6.46   | 0.993 | 0.849 | 0.967 | 35.21   | 1.010 | 0.502 | 0.797 | 1.008 | 0.980-1.036 | 0.731 |

|                                                                                                      |        |       |       |       |        |       |       |       |       |             |       |
|------------------------------------------------------------------------------------------------------|--------|-------|-------|-------|--------|-------|-------|-------|-------|-------------|-------|
| Firmicutes; Clostridia; Clostridiales; Lachnospiraceae; Coprococcus                                  | 208.88 | 0.990 | 0.541 | 0.967 | 207.84 | 1.006 | 0.436 | 0.797 | 1.003 | 0.990-1.017 | 0.901 |
| Firmicutes; Bacilli; Lactobacillales; Streptococcaceae; Streptococcus                                | 55.61  | 0.957 | 0.299 | 0.875 | 57.84  | 0.985 | 0.443 | 0.797 | 0.980 | 0.947-1.015 | 0.202 |
| Firmicutes; Bacilli; Turicibacterales; Turicibacteraceae; Turicibacter                               | 4.19   | 0.997 | 0.942 | 0.967 | 6.02   | 1.017 | NA    | NA    | 1.013 | 0.975-1.053 | NA    |
| Proteobacteria; Gammaproteobacteria; Pasteurellales; Pasteurellaceae; Haemophilus                    | 4.27   | 0.988 | 0.795 | 0.967 | 4.03   | 1.011 | NA    | NA    | 1.007 | 0.969-1.046 | NA    |
| Proteobacteria; Betaproteobacteria; Burkholderiales; Alcaligenaceae; Sutterella                      | 4.32   | 1.008 | 0.849 | 0.967 | 85.39  | 1.008 | 0.653 | 0.797 | 1.008 | 0.976-1.040 | 0.650 |
| <b>SPECIES LEVEL</b>                                                                                 |        |       |       |       |        |       |       |       |       |             |       |
| Actinobacteria; Coriobacteriia; Coriobacteriales; Coriobacteriaceae; Collinsella; aerofaciens        | 25.31  | 1.051 | 0.349 | 0.884 | 13.58  | 0.988 | 0.571 | 0.839 | 0.997 | 0.958-1.037 | 0.799 |
| Actinobacteria; Coriobacteriia; Coriobacteriales; Coriobacteriaceae; Egerthella; lenta               | 6.14   | 0.984 | NA    | NA    | 1.99   | 0.986 | 0.613 | 0.839 | 0.986 | 0.939-1.035 | NA    |
| Actinobacteria; Actinobacteria; Bifidobacteriales; Bifidobacteriaceae; Bifidobacterium; adolescentis | 38.42  | 1.007 | 0.898 | 0.951 | 75.56  | 1.002 | 0.932 | 0.964 | 1.003 | 0.959-1.049 | 0.880 |
| Bacteroidetes; Bacteroidia; Bacteroidales; Prevotellaceae; Prevotella; copri                         | 16.68  | 0.951 | NA    | NA    | 353.04 | 1.040 | NA    | NA    | 1.019 | 0.969-1.071 | NA    |
| Bacteroidetes; Bacteroidia; Bacteroidales; Porphyromonadaceae; Parabacteroides; distasonis           | 7.33   | 0.940 | 0.184 | 0.770 | 51.50  | 1.007 | 0.724 | 0.844 | 0.996 | 0.961-1.033 | 0.495 |
| Bacteroidetes; Bacteroidia; Bacteroidales; Bacteroidaceae; Bacteroides; uniformis                    | 32.05  | 0.948 | 0.202 | 0.770 | 305.56 | 0.972 | 0.128 | 0.540 | 0.968 | 0.936-1.001 | 0.048 |
| Bacteroidetes; Bacteroidia; Bacteroidales; Bacteroidaceae; Bacteroides; ovatus                       | 5.59   | 0.987 | 0.790 | 0.951 | 12.37  | 0.981 | 0.309 | 0.730 | 0.982 | 0.950-1.016 | 0.363 |
| Bacteroidetes; Bacteroidia; Bacteroidales; Bacteroidaceae; Bacteroides; fragilis                     | 20.37  | 1.058 | NA    | NA    | 16.33  | 0.989 | 0.651 | 0.844 | 1.000 | 0.958-1.044 | NA    |
| Firmicutes; Clostridia; Clostridiales; Veillonellaceae; Veillonella; dispar                          | 3.41   | 0.899 | 0.041 | 0.467 | 2.82   | 1.012 | 0.666 | 0.844 | 0.986 | 0.939-1.035 | 0.261 |
| Firmicutes; Clostridia; Clostridiales; Ruminococcaceae; Faecalibacterium; prausnitzii                | 230.05 | 1.032 | 0.354 | 0.884 | 540.38 | 1.025 | 0.103 | 0.540 | 1.026 | 0.999-1.053 | 0.070 |
| Firmicutes; Clostridia; Clostridiales; Ruminococcaceae; Ruminococcus; bromii                         | 24.12  | 0.966 | 0.489 | 0.951 | 1.65   | 0.969 | 0.161 | 0.578 | 0.968 | 0.930-1.008 | 0.138 |
| Firmicutes; Clostridia; Clostridiales; Lachnospiraceae; Dorea; formicigenerans                       | 1.92   | 1.033 | 0.447 | 0.915 | 20.11  | 1.018 | 0.323 | 0.730 | 1.020 | 0.988-1.054 | 0.216 |
| Firmicutes; Clostridi; Clostridiales; Lachnospiraceae; Roseburia; faecis                             | 1.12   | 0.995 | 0.918 | 0.951 | 2.28   | 1.011 | 0.562 | 0.839 | 1.009 | 0.975-1.044 | 0.733 |
| Firmicutes; Clostridia; Clostridiales; Lachnospiraceae; [Ruminococcus]; gnavus                       | 138.52 | 0.894 | NA    | NA    | 85.10  | 1.005 | 0.735 | 0.844 | 0.995 | 0.969-1.021 | NA    |
| Firmicutes; Clostridia; Clostridiales; Lachnospiraceae; Blautia; producta                            | 35.68  | 1.042 | NA    | NA    | 28.60  | 0.979 | 0.367 | 0.771 | 0.992 | 0.953-1.032 | NA    |
| Firmicutes; Erysipelotrichi; Erysipelotrichales; Erysipelotrichaceae; [Eubacterium]; dolichum        | 7.70   | 0.934 | 0.198 | 0.770 | 3.34   | 0.963 | 0.122 | 0.540 | 0.958 | 0.917-1.000 | 0.045 |
| Firmicutes; Erysipelotrichi; Erysipelotrichales; Erysipelotrichaceae; [Eubacterium]; biforme         | 10.94  | 0.928 | NA    | NA    | 39.95  | 1.015 | 0.635 | 0.842 | 0.993 | 0.943-1.045 | NA    |

Relationship between higher quartiles of fiber intake and differential taxon abundance was evaluated using negative binomial generalized linear models in the DESeq2 package in R. Models were adjusted for age, sex, race, categorical BMI and cigarette smoking status. This table reports

on all taxa from a taxonomy-based meta-analysis to evaluate the relationship between taxa abundance by fiber intake in both study populations.  $\text{Log}_2FC = \text{Log}_2 \text{Fold Change}$ ;  $FC = \text{Fold Change}$
